# Supplementary material
Source: PubMed Central journal article supplement (PMC2533440)
Supplement: NIHMS62825-supplement-1si20051021_03.pdf [file NIHMS62825-supplement-1si20051021_03.pdf]

## Phaeofurans and Sorbicillin Analogs from a Fungicolous *Phaeoacremonium* Species

Ricardo F. Reátegui,<sup>†</sup> Donald T. Wicklow,<sup>‡</sup> and James B. Gloer,<sup>†,\*</sup>

*Department of Chemistry, University of Iowa, Iowa City, Iowa 52242 and Mycotoxin Research Unit, Agricultural Research Service, National Center for Agricultural Utilization Research, USDA, Peoria, Illinois 61604*

### List of Supporting Information

- Figure S1.** <sup>1</sup>H NMR spectrum of phaeofuran A (**1**; 400 MHz, acetone-*d*<sub>6</sub>)
- Figure S2.** <sup>13</sup>C NMR spectrum of phaeofuran A (**1**; 100 MHz, acetone-*d*<sub>6</sub>)
- Figure S3.** <sup>1</sup>H NMR spectrum of phaeofuran B (**2**; 400 MHz, acetone-*d*<sub>6</sub>)
- Figure S4.** <sup>13</sup>C NMR spectrum of phaeofuran B (**2**; 100 MHz, acetone-*d*<sub>6</sub>)
- Figure S5.** <sup>1</sup>H NMR spectrum of 1-(2'-hydroxy-4'-methoxy-5'-methylphenyl)-*E,E*-2,4-hexadiene-1-one (**4**; 400 MHz, CDCl<sub>3</sub>)
- Figure S6.** <sup>13</sup>C NMR spectrum of 1-(2'-hydroxy-4'-methoxy-5'-methylphenyl)-*E,E*-2,4-hexadiene-1-one (**4**; 100 MHz, CDCl<sub>3</sub>)
- Figure S7.** <sup>1</sup>H NMR spectrum of 1-(2'-hydroxy-4'-methoxy-5'-hydroxymethylphenyl)-*E*-4-hexene-1-one (**5**; 300 MHz, CDCl<sub>3</sub>)
- Figure S8.** <sup>13</sup>C NMR spectrum of 1-(2'-hydroxy-4'-methoxy-5'-hydroxymethylphenyl)-*E*-4-hexene-1-one (**5**; 75 MHz, CDCl<sub>3</sub>)

---

\* To whom correspondence should be addressed. Tel.: (319) 335-1361. Fax: (319) 335-1270. E-mail: james-gloer@uiowa.edu.

<sup>†</sup> University of Iowa

<sup>‡</sup> USDA

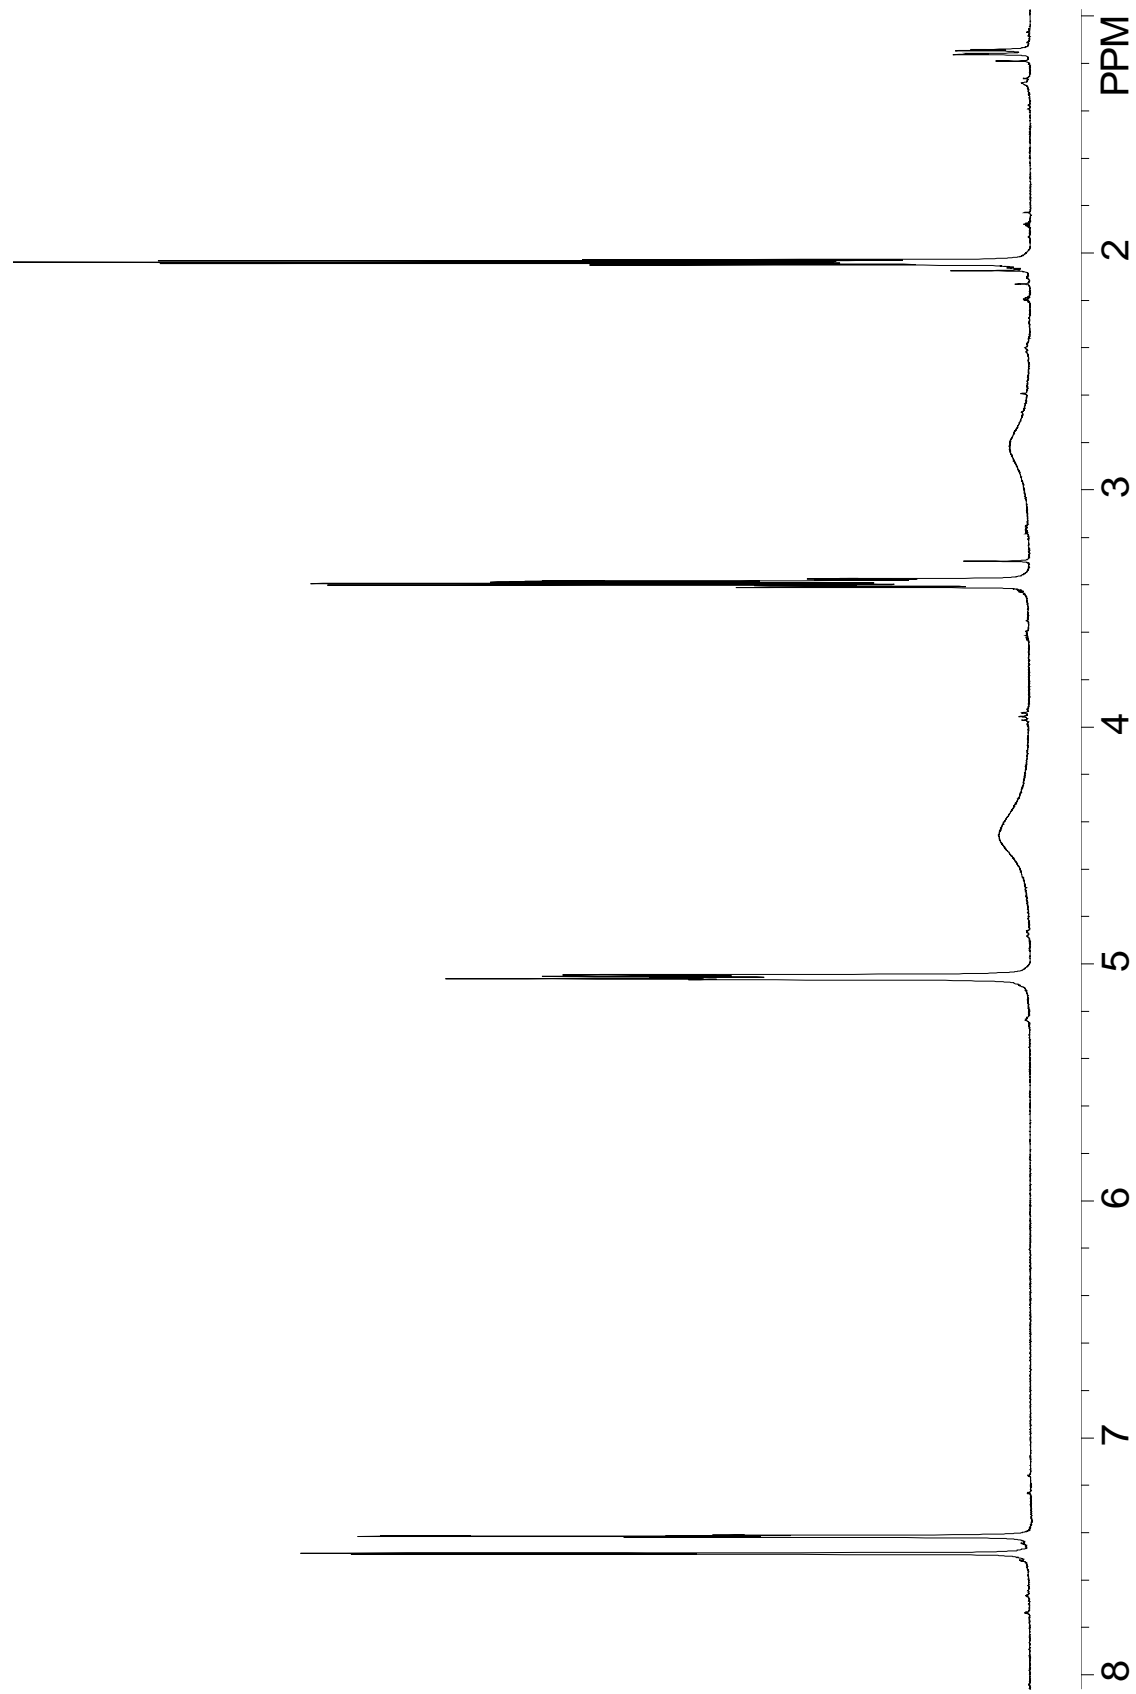

Figure S1.  $^1\text{H}$  NMR Spectrum of Phaeofuran A (**1**); 400 MHz, acetone- $d_6$

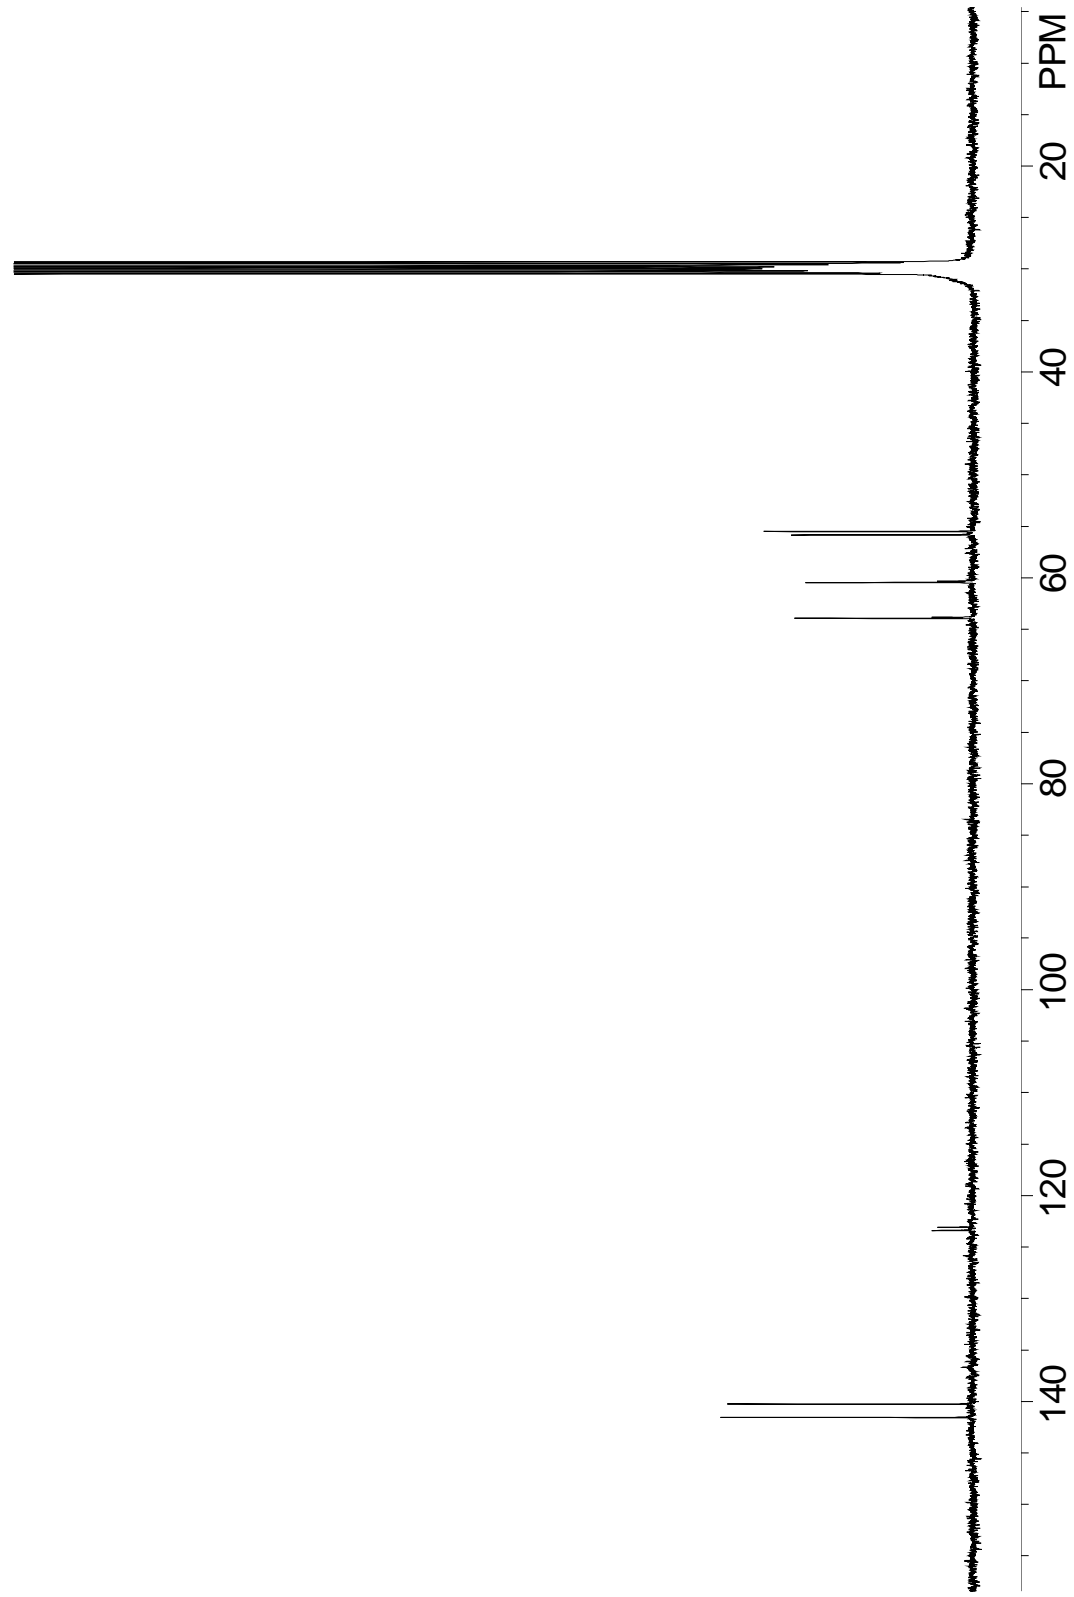

Figure S2.  $^{13}\text{C}$  NMR Spectrum of Phaeofuran A (**1**); 100 MHz,  $\text{acetone-}d_6$

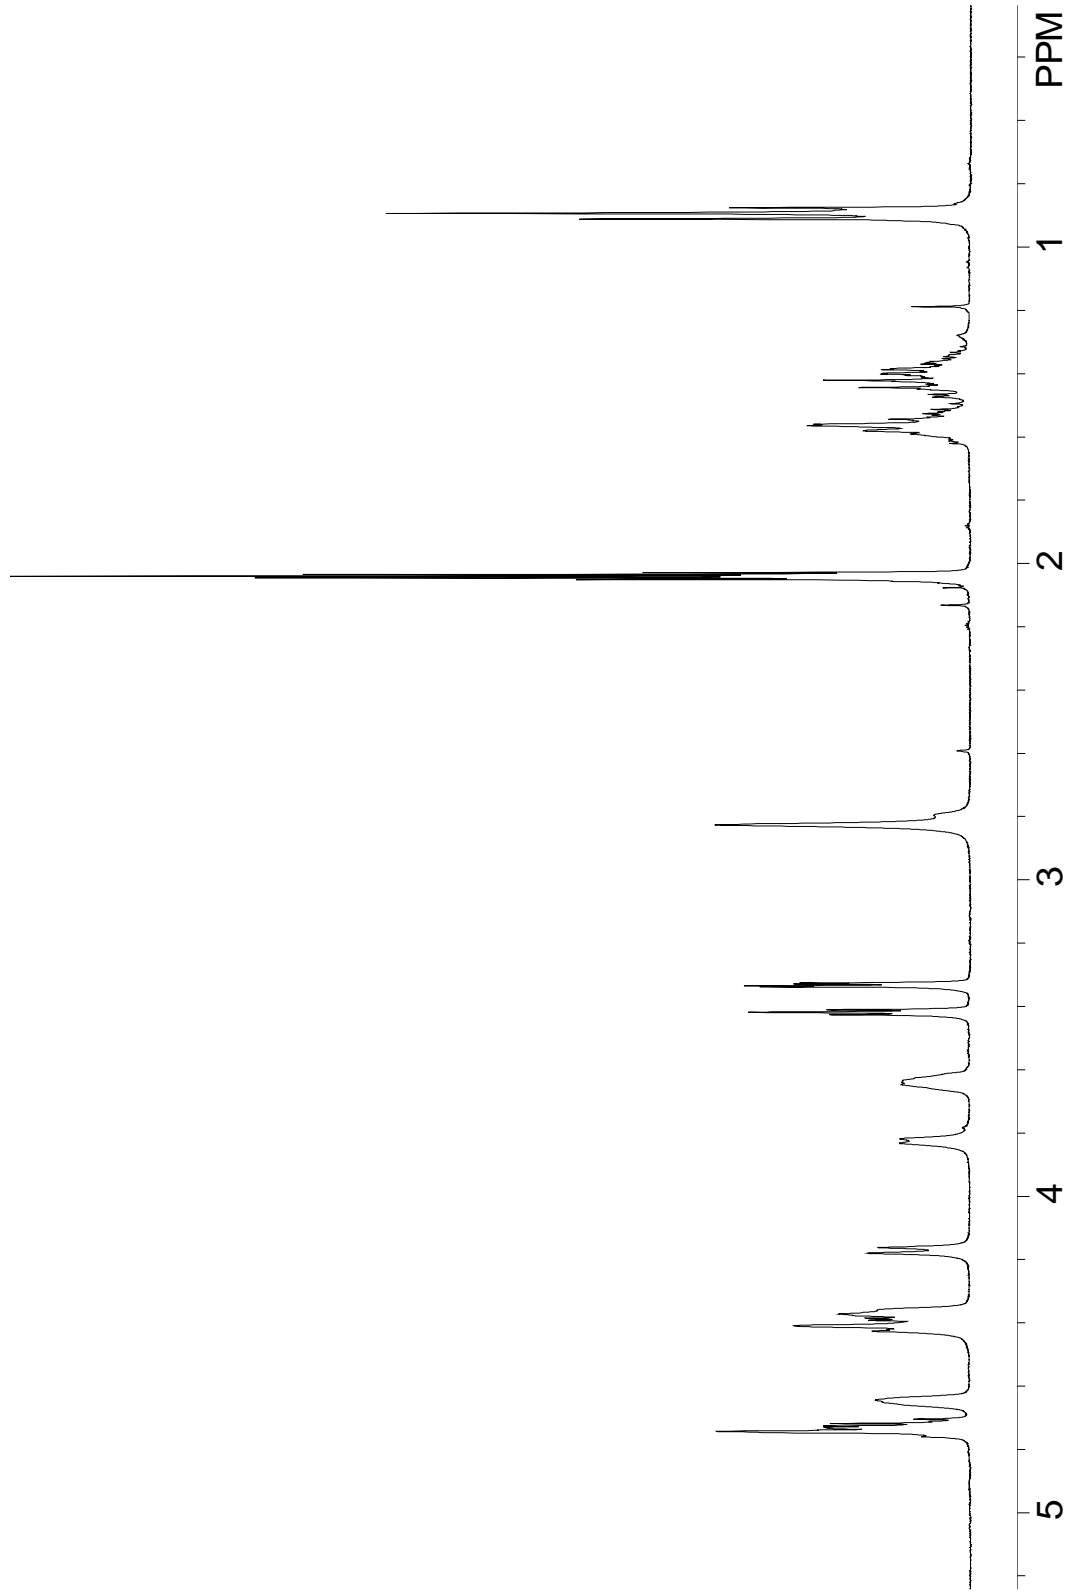

Figure S3.  $^1\text{H}$  NMR Spectrum of Phaeofuran B (2); 400 MHz, acetone- $d_6$

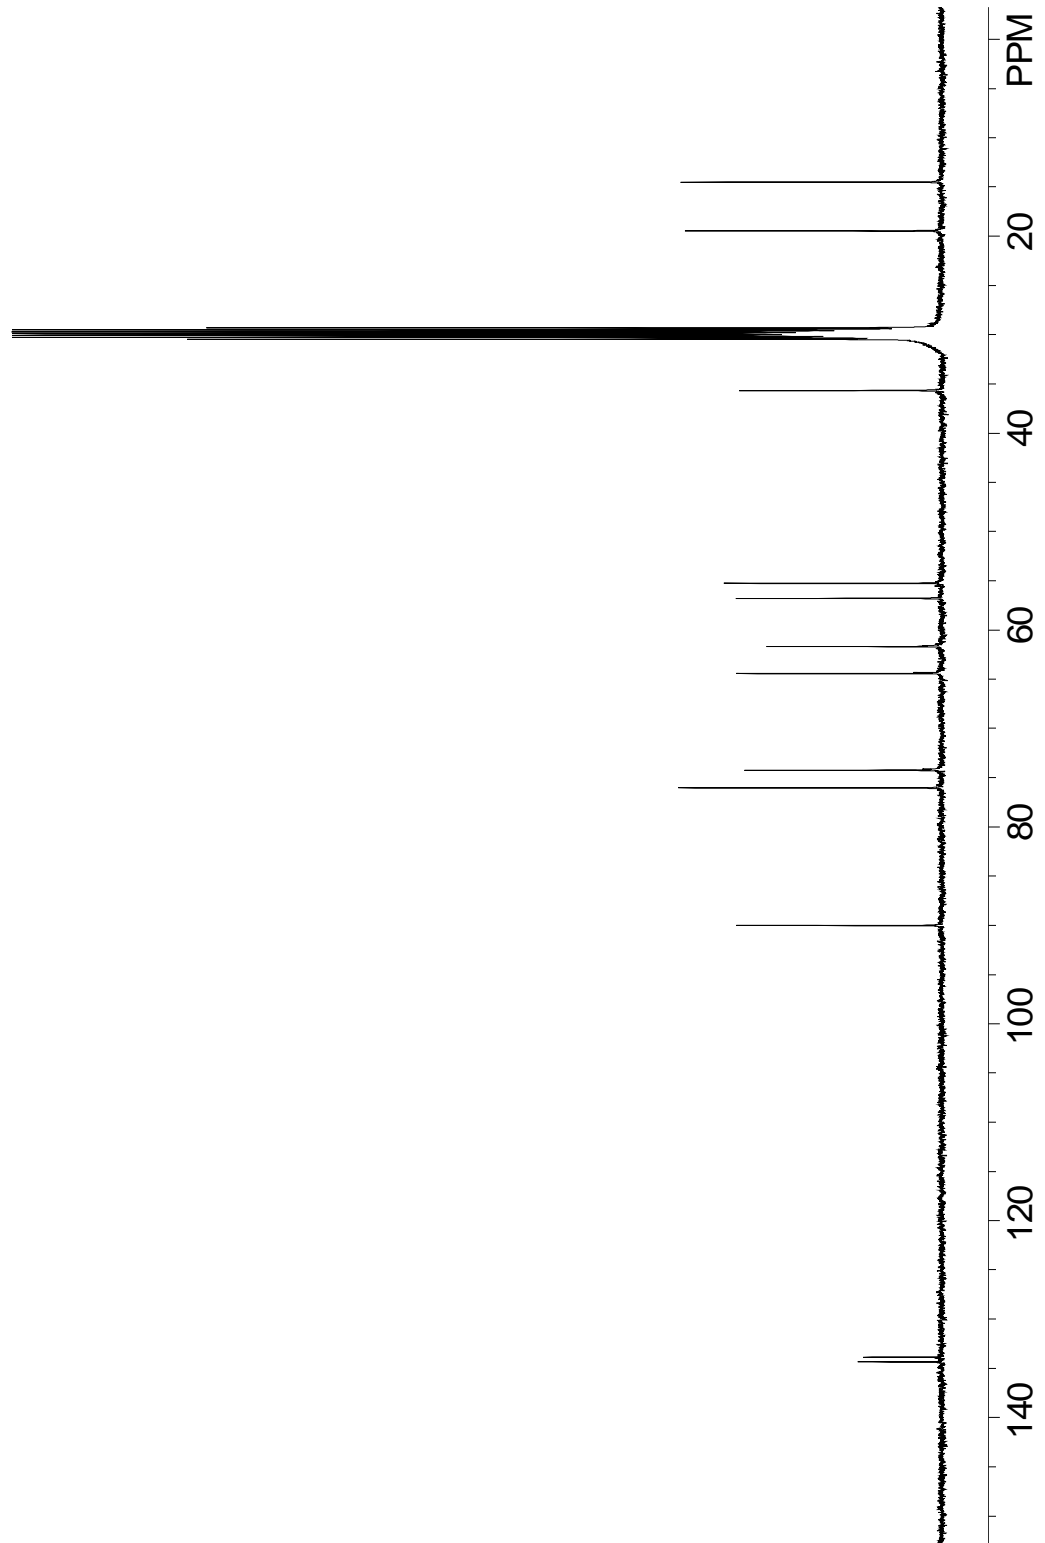

Figure S4.  $^{13}\text{C}$  NMR Spectrum of Phaeofuran B (2; 100 MHz,  $\text{acetone-}d_6$ )

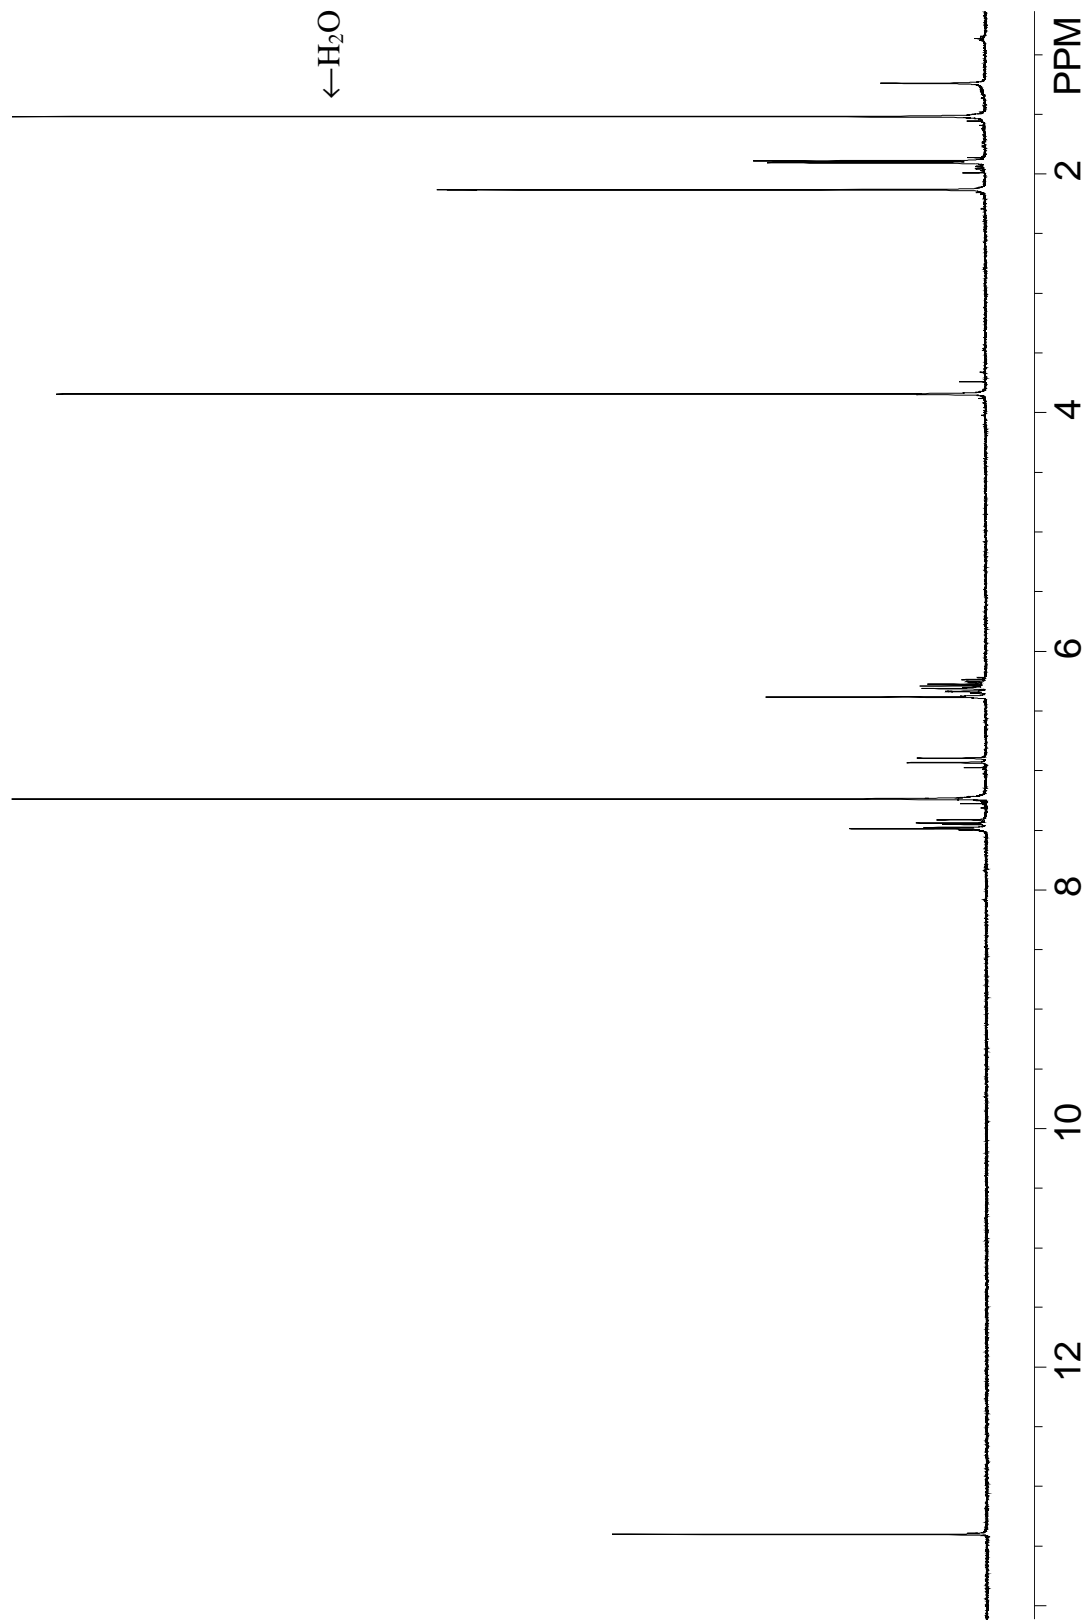

Figure S5.  $^1\text{H}$  NMR Spectrum of 1-(2'-hydroxy-4'-methoxy-5'-methyl)-*E,E*-2,4-hexadiene-1-one (4; 400 MHz,  $\text{CDCl}_3$ )

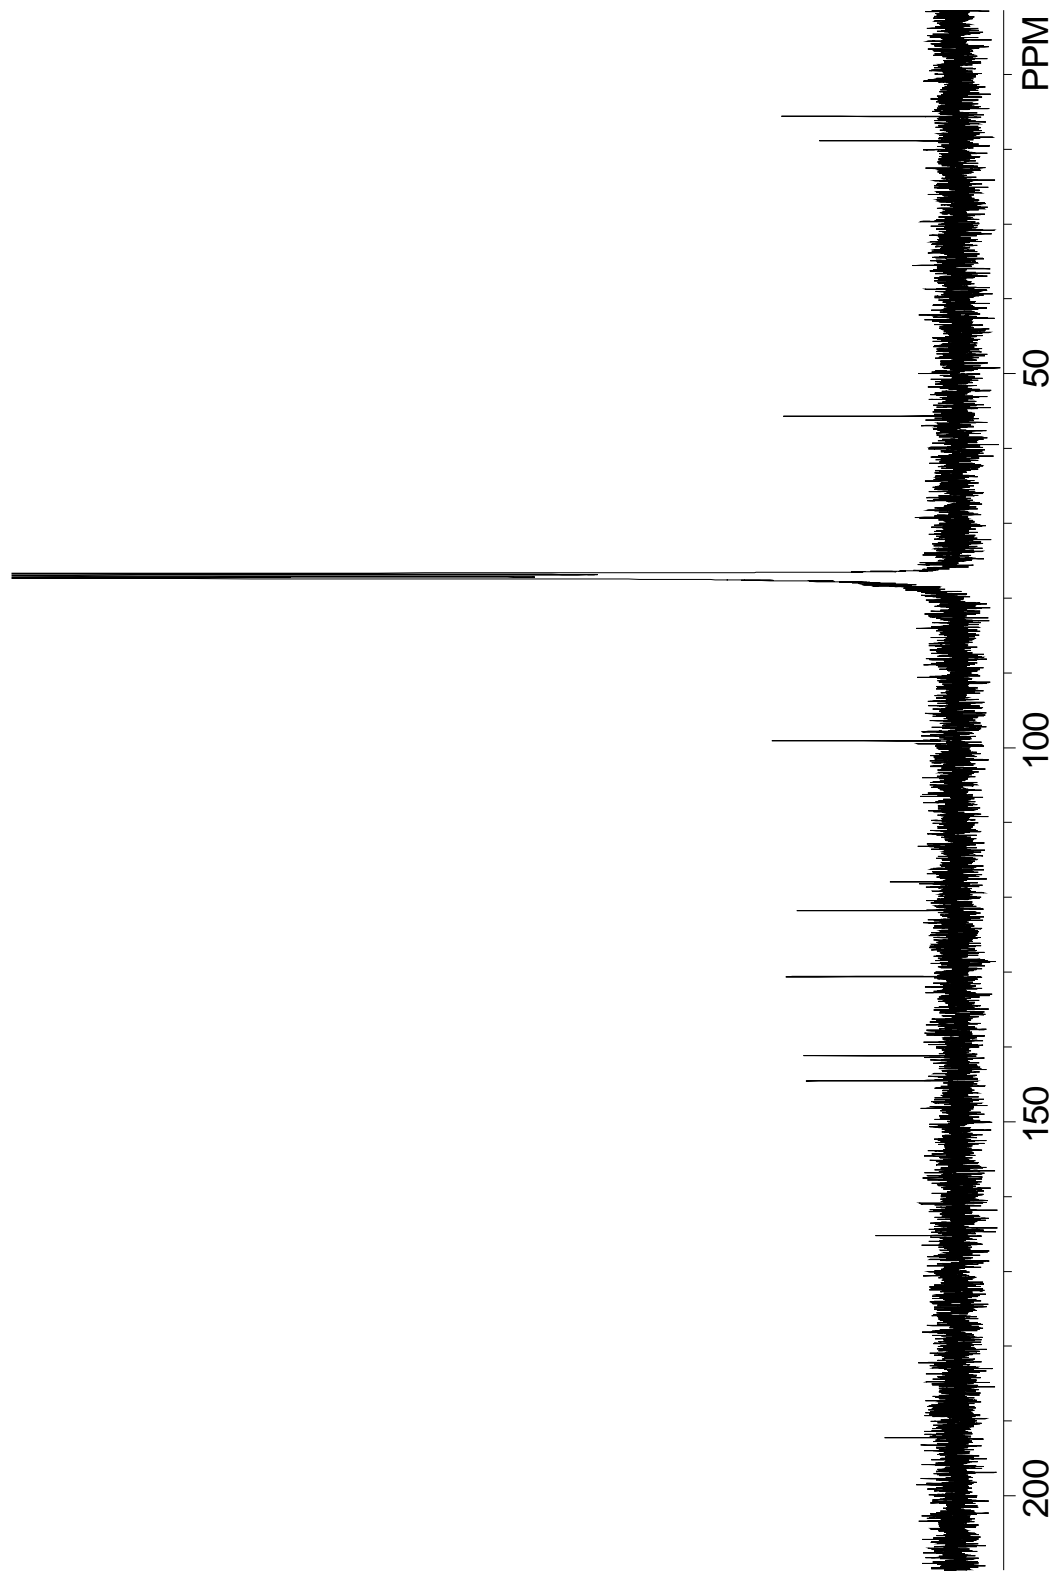

Figure S6.  $^{13}\text{C}$  NMR Spectrum of 1-(2'-(2'-Hydroxy-4'-methoxy-5'-methyl)-*E, E*-2,4-hexadiene-1-one (4; 100 MHz,  $\text{CDCl}_3$ )

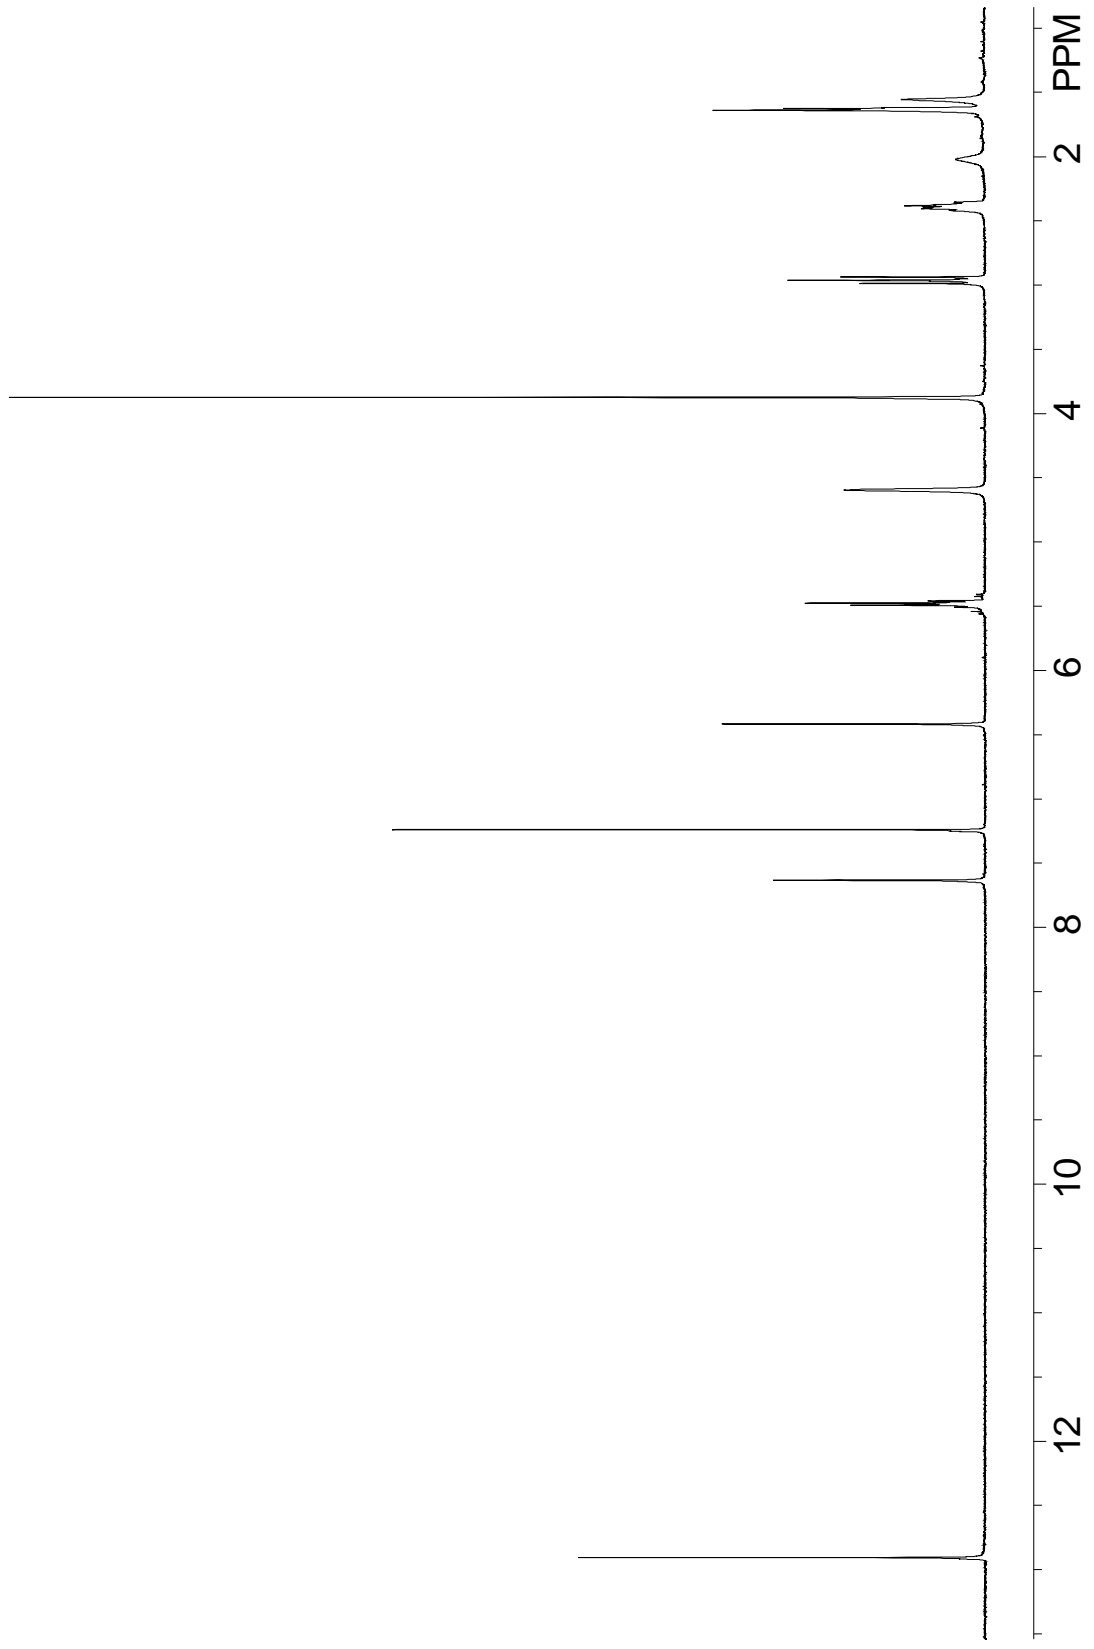

Figure S7. <sup>1</sup>H NMR Spectrum of 1-(2'-Hydroxy-4'-methoxy-5'-hydroxymethyl)-E-4-hexen-1-one (**5**; 300 MHz, CDCl<sub>3</sub>)



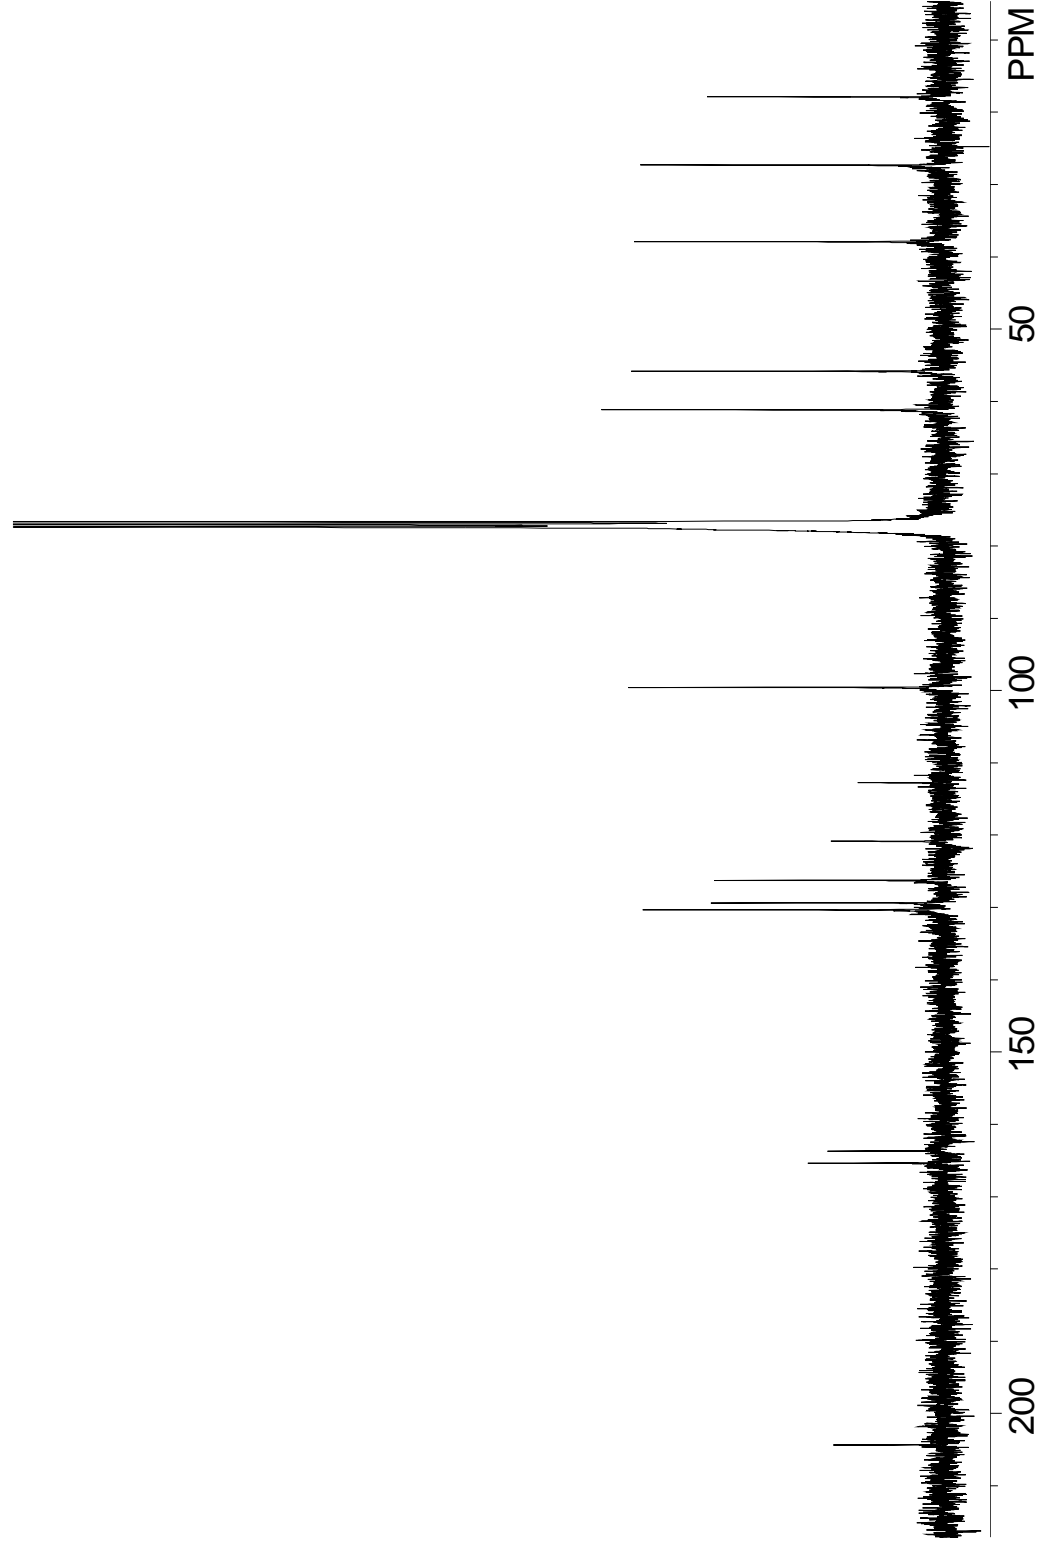

Figure S8.  $^{13}\text{C}$  NMR Spectrum of 1-(2'-Hydroxy-4'-methoxy-5'-hydroxymethyl)-E-4-hexen-1-one (**5**); 75 MHz,  $\text{CDCl}_3$
